# Supplementary material for: Evolution of Smooth Tubercle Bacilli PE and PE_PGRS Genes: Evidence for a Prominent Role of Recombination and Imprint of Positive Selection
Source: PubMed Central journal article supplement (PMC3660525; doi:10.1371/journal.pone.0064718), 2013-05-21

# PE3

| Model      | K        | $-\ell$        | AIC <sub>1</sub>   | AIC <sub>2</sub>   | BIC $\blacktriangle$ |
|------------|----------|----------------|--------------------|--------------------|----------------------|
| <b>F81</b> | <b>3</b> | <b>1891,15</b> | <b>3814,30 (0)</b> | <b>3814,72 (0)</b> | <b>3897,19 (0)</b>   |
| F81+I      | 4        | 1890,42        | 3814,84 (0)        | 3815,32 (0)        | 3902,92 (0)          |
| HKY        | 4        | 1891,11        | 3816,21 (0)        | 3816,68 (0)        | 3904,29 (0)          |
| TrN        | 5        | 1889,80        | 3815,59 (0)        | 3816,12 (0)        | 3908,85 (0)          |
| K81uf      | 5        | 1889,92        | 3815,84 (0)        | 3816,36 (0)        | 3909,09 (0)          |
| HKY+I      | 5        | 1890,38        | 3816,76 (0)        | 3817,28 (0)        | 3910,01 (0)          |
| TIM        | 6        | 1888,61        | 3815,22 (0)        | 3815,80 (0)        | 3913,65 (0)          |
| TrN+I      | 6        | 1889,07        | 3816,14 (0)        | 3816,72 (0)        | 3914,57 (0)          |
| K81uf+I    | 6        | 1889,19        | 3816,38 (0)        | 3816,97 (0)        | 3914,82 (0)          |
| TIM+I      | 7        | 1887,88        | 3815,76 (0)        | 3816,41 (0)        | 3919,38 (0)          |
| TVM        | 7        | 1888,73        | 3817,45 (0)        | 3818,10 (0)        | 3921,07 (0)          |
| GTR        | 8        | 1887,49        | 3816,97 (0)        | 3817,69 (0)        | 3925,77 (0)          |
| TVM+I      | 8        | 1888,00        | 3818,01 (0)        | 3818,72 (0)        | 3926,81 (0)          |
| GTR+I      | 9        | 1886,76        | 3817,52 (0)        | 3818,30 (0)        | 3931,50 (0)          |
| JC         | 0        | 1937,09        | 3900,19 (0)        | 3900,47 (0)        | 3967,54 (0)          |
| JC+I       | 1        | 1936,37        | 3900,74 (0)        | 3901,06 (0)        | 3973,27 (0)          |
| K80        | 1        | 1937,08        | 3902,15 (0)        | 3902,48 (0)        | 3974,68 (0)          |
| K81        | 2        | 1935,61        | 3901,21 (0)        | 3901,58 (0)        | 3978,92 (0)          |
| TrNef      | 2        | 1935,91        | 3901,82 (0)        | 3902,18 (0)        | 3979,53 (0)          |
| K80+I      | 2        | 1936,35        | 3902,71 (0)        | 3903,08 (0)        | 3980,42 (0)          |
| TIMef      | 3        | 1934,44        | 3900,87 (0)        | 3901,29 (0)        | 3983,77 (0)          |

Select as default model for this alignment

## F81 (Felsenstein,1981)

Rate Heterogeneity ( $\Gamma$ ):  $\alpha = n/a$   
 Proportion of Invariant Sites:  $pINV = n/a$   
 Substitution Rates: 1,000 | 1,000 | 1,000 | 1,000 | 1,000 | 1,000  
 (000000)  
 Base Frequencies: 0,186 | 0,343 | 0,282 | 0,188  
 (0123)  
 Scores:  
 $\ell = -1891,15$ ; AIC<sub>1</sub> = 3814,30; AIC<sub>2</sub> = 3814,72; BIC = 3897,19  
 (df = 16; n = 1314)

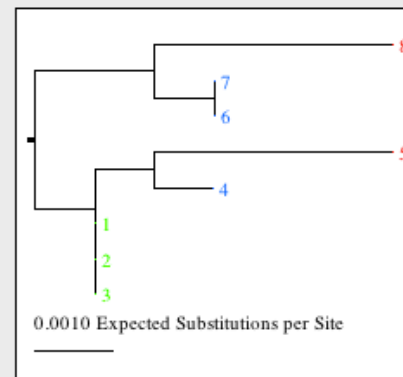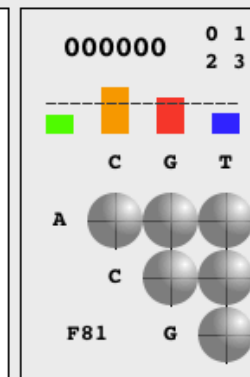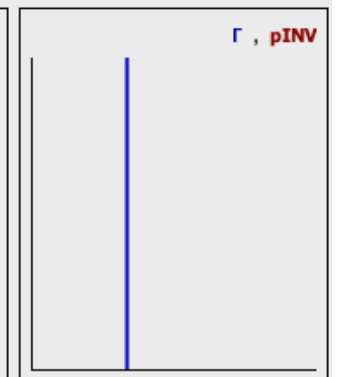

# PE4

| Model      | K | $-\ell$        | AIC <sub>1</sub>   | AIC <sub>2</sub>   | BIC ▲              |
|------------|---|----------------|--------------------|--------------------|--------------------|
| <b>HKY</b> | 4 | <b>2085,46</b> | 4204,93 (0)        | 4205,36 (0)        | <b>4294,45 (0)</b> |
| TrN        | 5 | 2082,82        | 4201,64 (0)        | 4202,13 (0)        | 4296,43 (0)        |
| F81        | 3 | 2090,11        | 4212,22 (0)        | 4212,60 (0)        | 4296,48 (0)        |
| HKY+I      | 5 | 2084,35        | 4204,69 (0)        | 4205,18 (0)        | 4299,48 (0)        |
| TrN+I      | 6 | 2081,71        | <b>4201,42 (0)</b> | <b>4201,96 (0)</b> | 4301,47 (0)        |
| F81+I      | 4 | 2089,00        | 4211,99 (0)        | 4212,43 (0)        | 4301,52 (0)        |
| K81uf      | 5 | 2086,42        | 4208,84 (0)        | 4209,32 (0)        | 4303,63 (0)        |
| TIM        | 6 | 2082,80        | 4203,60 (0)        | 4204,14 (0)        | 4303,66 (0)        |
| K81uf+I    | 6 | 2085,30        | 4208,60 (0)        | 4209,14 (0)        | 4308,66 (0)        |
| TIM+I      | 7 | 2081,69        | 4203,38 (0)        | 4203,98 (0)        | 4308,70 (0)        |
| TVM        | 7 | 2083,39        | 4206,78 (0)        | 4207,38 (0)        | 4312,10 (0)        |
| GTR        | 8 | 2081,11        | 4204,22 (0)        | 4204,88 (0)        | 4314,81 (0)        |
| TVM+I      | 8 | 2082,25        | 4206,51 (0)        | 4207,16 (0)        | 4317,10 (0)        |
| GTR+I      | 9 | 2080,08        | 4204,15 (0)        | 4204,87 (0)        | 4320,01 (0)        |
| K80        | 1 | 2140,63        | 4309,27 (0)        | 4309,56 (0)        | 4382,99 (0)        |
| JC         | 0 | 2144,81        | 4315,61 (0)        | 4315,87 (0)        | 4384,07 (0)        |
| TrNef      | 2 | 2138,24        | 4306,48 (0)        | 4306,82 (0)        | 4385,48 (0)        |
| K80+I      | 2 | 2139,52        | 4309,05 (0)        | 4309,39 (0)        | 4388,04 (0)        |
| JC+I       | 1 | 2143,70        | 4315,39 (0)        | 4315,69 (0)        | 4389,12 (0)        |
| K81        | 2 | 2140,56        | 4311,12 (0)        | 4311,46 (0)        | 4390,11 (0)        |
| TrNef+I    | 3 | 2137,20        | 4306,40 (0)        | 4306,78 (0)        | 4390,65 (0)        |

Select as default model for this alignment

**HKY** (HKY85; Hasegawa, Kishino and Yano,1985)

Rate Heterogeneity ( $\Gamma$ ):  $\alpha = n/a$   
 Proportion of Invariant Sites:  $pINV = n/a$   
 Substitution Rates: 1,000 | 4,006 | 1,000 | 1,000 | 4,006 | 1,000  
 (010010)  
 Base Frequencies: 0,182 | 0,344 | 0,291 | 0,183  
 (0123)  
 Scores:  
 $\ell = -2085,46$ ; AIC<sub>1</sub> = 4204,93; AIC<sub>2</sub> = 4205,36; BIC = 4294,45  
 (df = 17; n = 1431)

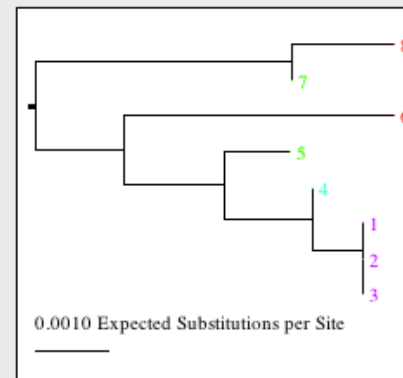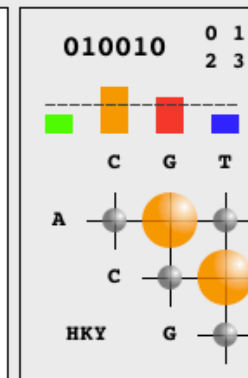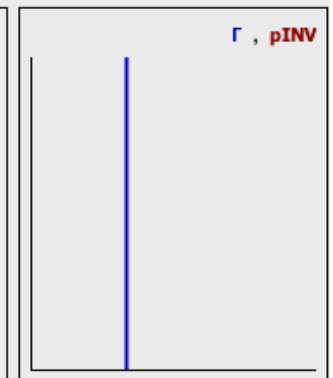

# PE\_PGRS26

| Model      | K | $-\ell$ | AIC <sub>1</sub> | AIC <sub>2</sub> | BIC ▲       |
|------------|---|---------|------------------|------------------|-------------|
| <b>HKY</b> | 4 | 1889,06 | 3812,12 (0)      | 3812,56 (0)      | 3901,43 (0) |
| TrN        | 5 | 1885,62 | 3807,25 (0)      | 3807,74 (0)      | 3901,81 (0) |
| HKY+I      | 5 | 1888,84 | 3813,67 (0)      | 3814,16 (0)      | 3908,23 (0) |
| TrN+I      | 6 | 1885,41 | 3808,82 (0)      | 3809,36 (0)      | 3908,63 (0) |
| K81uf      | 5 | 1889,06 | 3814,11 (0)      | 3814,60 (0)      | 3908,67 (0) |
| TIM        | 6 | 1885,62 | 3809,24 (0)      | 3809,79 (0)      | 3909,06 (0) |
| K81uf+I    | 6 | 1888,83 | 3815,67 (0)      | 3816,21 (0)      | 3915,48 (0) |
| TIM+I      | 7 | 1885,41 | 3810,81 (0)      | 3811,42 (0)      | 3915,88 (0) |
| TVM        | 7 | 1887,16 | 3814,32 (0)      | 3814,92 (0)      | 3919,39 (0) |
| GTR        | 8 | 1885,02 | 3812,03 (0)      | 3812,70 (0)      | 3922,36 (0) |
| TVM+I      | 8 | 1886,94 | 3815,87 (0)      | 3816,54 (0)      | 3926,19 (0) |
| F81        | 3 | 1906,43 | 3844,86 (0)      | 3845,25 (0)      | 3928,91 (0) |
| GTR+I      | 9 | 1884,81 | 3813,63 (0)      | 3814,35 (0)      | 3929,20 (0) |
| F81+I      | 4 | 1906,21 | 3846,42 (0)      | 3846,86 (0)      | 3935,73 (0) |
| K80        | 1 | 2119,87 | 4267,75 (2)      | 4268,05 (2)      | 4341,30 (2) |
| TrNef      | 2 | 2117,59 | 4265,18 (2)      | 4265,52 (2)      | 4343,98 (2) |
| K80+I      | 2 | 2119,64 | 4269,27 (2)      | 4269,62 (2)      | 4348,08 (2) |
| K81        | 2 | 2119,70 | 4269,40 (2)      | 4269,75 (2)      | 4348,21 (2) |
| TrNef+I    | 3 | 2117,40 | 4266,79 (2)      | 4267,18 (2)      | 4350,85 (2) |
| TIMef      | 3 | 2117,42 | 4266,83 (2)      | 4267,22 (2)      | 4350,89 (2) |
| K81+I      | 3 | 2119,46 | 4270,93 (2)      | 4271,32 (2)      | 4354,98 (2) |

Select as default model for this alignment

**HKY** (HKY85; Hasegawa, Kishino and Yano,1985)

Rate Heterogeneity ( $\Gamma$ ):  $\alpha = n/a$   
 Proportion of Invariant Sites:  $pINV = n/a$   
 Substitution Rates: 1,000 | 17,560 | 1,000 | 1,000 | 17,560 | 1,000  
 (010010)  
 Base Frequencies: 0,127 | 0,340 | 0,431 | 0,102  
 (0123)  
 Scores:  
 $\ell = -1889,06$ ; AIC<sub>1</sub> = 3812,12; AIC<sub>2</sub> = 3812,56; BIC = 3901,43  
 (df = 17; n = 1413)

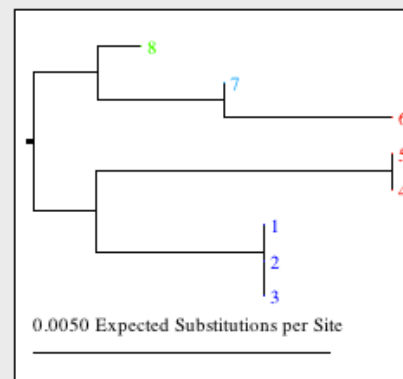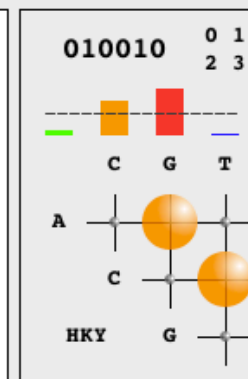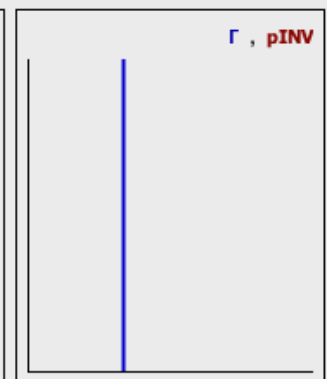

# PE\_PGRS35

| Model      | K | $-\ell$        | AIC <sub>1</sub>   | AIC <sub>2</sub>   | BIC $\blacktriangle$ |
|------------|---|----------------|--------------------|--------------------|----------------------|
| <b>F81</b> | 3 | <b>2272,08</b> | <b>4576,17 (0)</b> | <b>4576,51 (0)</b> | <b>4662,41 (0)</b>   |
| F81+I      | 4 | 2271,64        | 4577,28 (2)        | 4577,66 (2)        | 4668,91 (2)          |
| HKY        | 4 | 2272,08        | 4578,17 (0)        | 4578,55 (0)        | 4669,80 (0)          |
| HKY+I      | 5 | 2271,64        | 4579,28 (2)        | 4579,71 (2)        | 4676,30 (2)          |
| TrN        | 5 | 2272,08        | 4580,17 (0)        | 4580,59 (0)        | 4677,19 (0)          |
| K81uf      | 5 | 2272,08        | 4580,17 (0)        | 4580,59 (0)        | 4677,19 (0)          |
| TrN+I      | 6 | 2271,64        | 4581,28 (2)        | 4581,76 (2)        | 4683,69 (2)          |
| K81uf+I    | 6 | 2271,64        | 4581,28 (2)        | 4581,76 (2)        | 4683,69 (2)          |
| TIM        | 6 | 2272,08        | 4582,17 (0)        | 4582,64 (0)        | 4684,58 (0)          |
| TIM+I      | 7 | 2271,64        | 4583,28 (2)        | 4583,81 (2)        | 4691,08 (2)          |
| TVM        | 7 | 2272,08        | 4584,17 (0)        | 4584,69 (0)        | 4691,97 (0)          |
| TVM+I      | 8 | 2271,64        | 4585,28 (2)        | 4585,86 (2)        | 4698,47 (2)          |
| GTR        | 8 | 2272,08        | 4586,17 (0)        | 4586,75 (0)        | 4699,36 (0)          |
| GTR+I      | 9 | 2271,64        | 4587,28 (2)        | 4587,91 (2)        | 4705,86 (2)          |
| JC         | 0 | 2350,81        | 4727,61 (2)        | 4727,84 (2)        | 4797,68 (2)          |
| JC+I       | 1 | 2350,36        | 4728,73 (0)        | 4728,99 (0)        | 4804,19 (0)          |
| K80        | 1 | 2350,81        | 4729,61 (2)        | 4729,87 (2)        | 4805,07 (2)          |
| K80+I      | 2 | 2350,36        | 4730,73 (0)        | 4731,02 (0)        | 4811,58 (0)          |
| TrNef      | 2 | 2350,81        | 4731,61 (2)        | 4731,91 (2)        | 4812,46 (2)          |
| K81        | 2 | 2350,81        | 4731,61 (2)        | 4731,91 (2)        | 4812,46 (2)          |
| TrNef+I    | 3 | 2350,36        | 4732,73 (0)        | 4733,06 (0)        | 4818,97 (0)          |

Select as default model for this alignment

## F81 (Felsenstein,1981)

Rate Heterogeneity ( $\Gamma$ ):  $\alpha = n/a$   
 Proportion of Invariant Sites: pINV = n/a  
 Substitution Rates: 1,000 | 1,000 | 1,000 | 1,000 | 1,000 | 1,000  
 (000000)  
 Base Frequencies: 0,170 | 0,313 | 0,341 | 0,175  
 (0123)  
 Scores:  
 $\ell = -2272,08$ ; AIC<sub>1</sub> = 4576,17; AIC<sub>2</sub> = 4576,51; BIC = 4662,41  
 (df = 16; n = 1620)

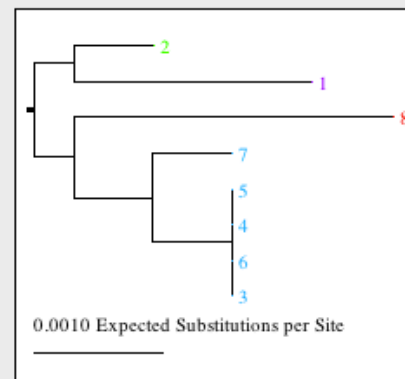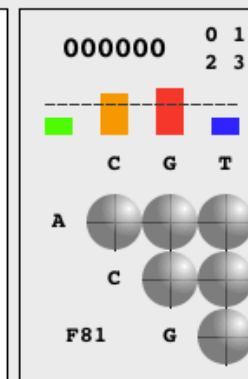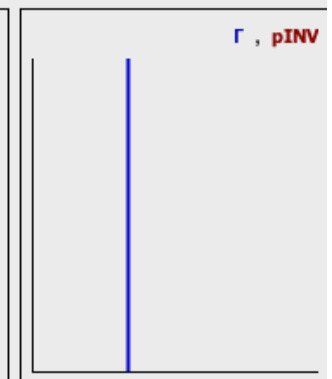

# PE\_PGRS51

| Model   | K | $-\ell$ | AIC <sub>1</sub> | AIC <sub>2</sub> | BIC $\blacktriangle$ |
|---------|---|---------|------------------|------------------|----------------------|
| TrN+I   | 6 | 2488,27 | 5014,54 (0)      | 5014,99 (0)      | 5117,94 (0)          |
| K81uf+I | 6 | 2488,67 | 5015,34 (0)      | 5015,79 (0)      | 5118,75 (0)          |
| TrN     | 5 | 2492,53 | 5021,05 (0)      | 5021,46 (0)      | 5119,02 (0)          |
| K81uf   | 5 | 2492,92 | 5021,85 (0)      | 5022,26 (0)      | 5119,81 (0)          |
| TVM+I   | 8 | 2483,63 | 5009,26 (0)      | 5009,80 (0)      | 5123,55 (0)          |
| TIM+I   | 7 | 2487,74 | 5015,49 (0)      | 5015,99 (0)      | 5124,34 (0)          |
| TVM     | 7 | 2487,90 | 5015,81 (0)      | 5016,31 (0)      | 5124,66 (0)          |
| TIM     | 6 | 2492,01 | 5022,03 (0)      | 5022,48 (0)      | 5125,44 (0)          |
| HKY+I   | 5 | 2496,80 | 5029,60 (0)      | 5030,01 (0)      | 5127,57 (0)          |
| HKY     | 4 | 2501,13 | 5036,26 (0)      | 5036,62 (0)      | 5128,78 (0)          |
| GTR+I   | 9 | 2485,15 | 5014,29 (0)      | 5014,89 (0)      | 5134,03 (0)          |
| GTR     | 8 | 2489,35 | 5020,71 (0)      | 5021,26 (0)      | 5135,00 (0)          |
| F81+I   | 4 | 2506,35 | 5046,70 (0)      | 5047,06 (0)      | 5139,22 (0)          |
| F81     | 3 | 2510,54 | 5053,09 (0)      | 5053,41 (0)      | 5140,17 (0)          |
| TrNef+I | 3 | 2724,22 | 5480,44 (0)      | 5480,77 (0)      | 5567,52 (0)          |
| TrNef   | 2 | 2728,34 | 5486,69 (0)      | 5486,97 (0)      | 5568,33 (0)          |
| TVMef+I | 5 | 2717,89 | 5471,78 (0)      | 5472,19 (0)      | 5569,75 (0)          |
| TVMef   | 4 | 2722,33 | 5478,65 (0)      | 5479,01 (0)      | 5571,17 (0)          |
| K81+I   | 3 | 2727,85 | 5487,70 (0)      | 5488,02 (0)      | 5574,78 (0)          |
| TIMef+I | 4 | 2724,22 | 5482,44 (0)      | 5482,81 (0)      | 5574,97 (0)          |

Select as default model for this alignment

## TrN (TN; TN93; Tamura and Nei, 1993)

Rate Heterogeneity ( $\Gamma$ ):  $\alpha = n/a$   
 Proportion of Invariant Sites: pINV = 0,349  
 Substitution Rates: 1,000 | 4,510 | 1,000 | 1,000 | 7,235 | 1,000  
 (010020)  
 Base Frequencies: 0,149 | 0,330 | 0,416 | 0,104  
 (0123)  
 Scores:  
 $\ell = -2488,27$ ; AIC<sub>1</sub> = 5014,54; AIC<sub>2</sub> = 5014,99; BIC = 5117,94  
 (df = 19; n = 1707)

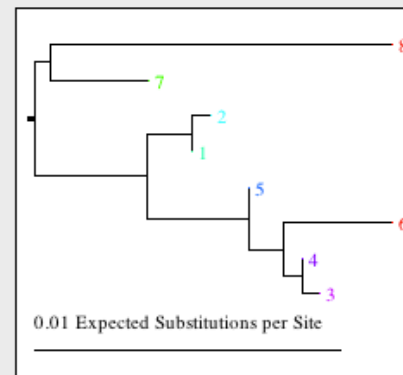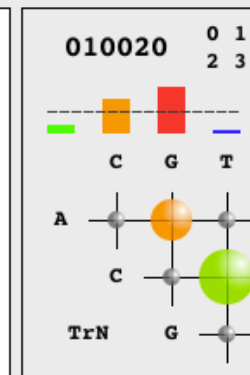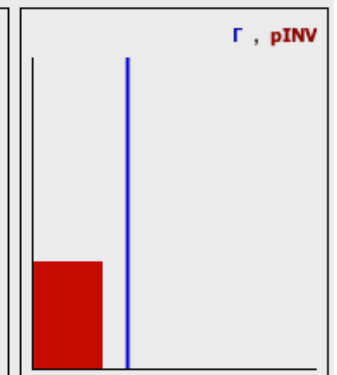

# PE\_PGRS62

| Model      | K | $-\ell$        | AIC <sub>1</sub>   | AIC <sub>2</sub>   | BIC $\blacktriangle$ |
|------------|---|----------------|--------------------|--------------------|----------------------|
| <b>F81</b> | 3 | <b>1977,49</b> | <b>3986,98 (0)</b> | <b>3987,36 (0)</b> | <b>4071,40 (0)</b>   |
| HKY        | 4 | 1977,49        | 3988,98 (0)        | 3989,41 (0)        | 4078,67 (0)          |
| F81+I      | 4 | 1977,49        | 3988,98 (0)        | 3989,41 (0)        | 4078,67 (0)          |
| TrN        | 5 | 1977,49        | 3990,98 (0)        | 3991,46 (0)        | 4085,95 (0)          |
| K81uf      | 5 | 1977,49        | 3990,98 (0)        | 3991,46 (0)        | 4085,95 (0)          |
| HKY+I      | 5 | 1977,49        | 3990,98 (0)        | 3991,46 (0)        | 4085,95 (0)          |
| TIM        | 6 | 1977,49        | 3992,98 (0)        | 3993,51 (0)        | 4093,22 (0)          |
| TrN+I      | 6 | 1977,49        | 3992,98 (0)        | 3993,52 (0)        | 4093,23 (0)          |
| K81uf+I    | 6 | 1977,49        | 3992,98 (0)        | 3993,52 (0)        | 4093,23 (0)          |
| TVM        | 7 | 1977,49        | 3994,98 (0)        | 3995,57 (0)        | 4100,50 (0)          |
| TIM+I      | 7 | 1977,49        | 3994,98 (0)        | 3995,57 (0)        | 4100,50 (0)          |
| GTR        | 8 | 1977,49        | 3996,98 (0)        | 3997,63 (0)        | 4107,77 (0)          |
| TVM+I      | 8 | 1977,49        | 3996,98 (0)        | 3997,63 (0)        | 4107,78 (0)          |
| GTR+I      | 9 | 1977,49        | 3998,98 (0)        | 3999,70 (0)        | 4115,05 (0)          |
| JC         | 0 | 2039,30        | 4104,61 (0)        | 4104,86 (0)        | 4173,20 (0)          |
| K80        | 1 | 2039,30        | 4106,61 (0)        | 4106,90 (0)        | 4180,47 (0)          |
| JC+I       | 1 | 2039,31        | 4106,61 (0)        | 4106,91 (0)        | 4180,47 (0)          |
| TrNef      | 2 | 2039,30        | 4108,61 (0)        | 4108,95 (0)        | 4187,75 (0)          |
| K81        | 2 | 2039,30        | 4108,61 (0)        | 4108,95 (0)        | 4187,75 (0)          |
| K80+I      | 2 | 2039,31        | 4108,61 (0)        | 4108,95 (0)        | 4187,75 (0)          |

Select as default model for this alignment

## F81 (Felsenstein,1981)

Rate Heterogeneity ( $\Gamma$ ):  $\alpha = n/a$   
 Proportion of Invariant Sites:  $pINV = n/a$   
 Substitution Rates: 1,000 | 1,000 | 1,000 | 1,000 | 1,000 | 1,000  
 (000000)  
 Base Frequencies: 0,177 | 0,351 | 0,288 | 0,183  
 (0123)  
 Scores:  
 $\ell = -1977,49$ ; AIC<sub>1</sub> = 3986,98; AIC<sub>2</sub> = 3987,36; BIC = 4071,40  
 (df = 16; n = 1445)

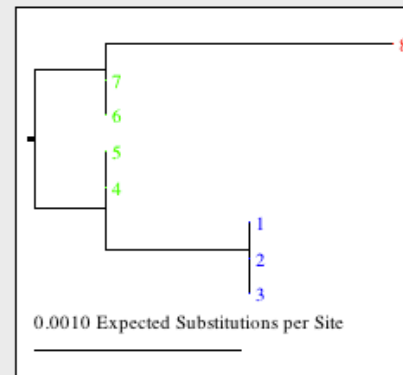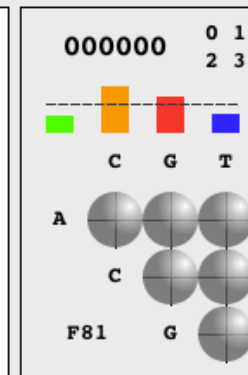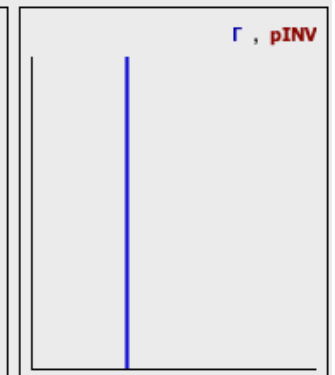

Supplement: pone.0064718.s005.pdf [file pone.0064718.s005.pdf]
